# Supplementary material for: Investigation of Chemical Constituents and Antioxidant Activity of Biologically Active Plant-Derived Natural Products
Source: MDPI journal article supplement (doi:10.3390/molecules28145572), 2023-07-21
Supplement: s1 [file s1]

Table S1. The comparison of methods used to detect phenolic compounds (PC).

| Method  | Ferric chloride test | Lead acetate test | Zinc hydrochloride test | Shinoda test | Folin-Ciocalteu test |
|---------|----------------------|-------------------|-------------------------|--------------|----------------------|
| Extract | PC                   |                   |                         |              | mg·ml <sup>-1</sup>  |
| Alv L   | -                    | +                 | -                       | +            | 0.36±0.00            |
| Am Fr   | +                    | -                 | -                       | -            | 1.13±0.02            |
| Arv H   | +                    | -                 | -/+                     | +            | 1.00±0.12            |
| Bv R    | -                    | +                 | +                       | -            | 0.53±0.02            |
| Co F    | +                    | -/+               | +                       | -/+          | 0.75±0.00            |
| Ea H    | +                    | -/+               | -/+                     | +            | 0.42±0.02            |
| Ep F    | +                    | -                 | +                       | -            | 3.17±0.03            |
| Ep L    | +                    | -                 | +                       | +            | 2.20±0.02            |
| Hp H    | +                    | -                 | -                       | -/+          | 1.47±0.05            |
| Hr Fr   | +                    | -                 | -                       | -            | 0.52±0.02            |
| Lc S    | -                    | -                 | -/+                     | -            | 0.13±0.01            |
| Mc F    | +                    | +                 | -/+                     | -/+          | 0.50±0.02            |
| Ob H    | +                    | +                 | -/+                     | +            | 1.44±0.03            |
| Pm H    | +                    | +                 | -/+                     | +            | 0.92±0.04            |
| Poa H   | +                    | -                 | -                       | +            | 0.36±0.00            |
| Ps S    | -                    | -                 | -                       | -            | 0.07±0.02            |
| Pta L   | +                    | -                 | -/+                     | +            | 3.11±0.03            |
| Sg L    | +                    | -                 | +                       | +            | 1.65±0.04            |
| So R    | +                    | -                 | -                       | -            | 0.88±0.02            |
| To F    | +                    | -                 | -/+                     | +            | 0.55±0.00            |
| To L    | +                    | -/+               | -/+                     | +            | 1.14±0.02            |
| To R    | -                    | -/+               | -                       | -/+          | 0.18±0.01            |
| Tp F    | +                    | -                 | +                       | -            | 0.82±0.04            |
| Ur L    | +                    | -                 | +                       | -/+          | 0.13±0.01            |
| Ur R    | -                    | +                 | +                       | -/+          | 0.09±0.01            |
| Vo R    | +                    | -/+               | +                       | +            | 0.46±0.01            |
| rpb+    | 0.46                 | -0.32             | 0.24                    | 0.01         |                      |
| rpb-    | 0.46                 | -0.19             | 0.15                    | 0.24         |                      |

Table S2. The comparison of methods used to detect tannins (TN).

| Method  | Ferric chloride test | Lead acetate test | Gelatin test | Alkaline reagent test | Bromine water test | Potassium dichromate test | HCl test |
|---------|----------------------|-------------------|--------------|-----------------------|--------------------|---------------------------|----------|
| Extract | TN                   | TN                | TN           | TN                    | TN                 | TN                        | TN       |
| Alv L   | -                    | +                 | -            | -                     | -                  | -                         | -        |
| Am Fr   | +                    | -                 | -            | -                     | -                  | -                         | -        |
| Arv H   | +                    | +                 | -            | -                     | +                  | -                         | -        |
| Bv R    | -                    | +                 | -            | -                     | -                  | -                         | -/+      |
| Co F    | +                    | +                 | -            | -                     | -                  | -                         | -/+      |
| Ea H    | +                    | +                 | -            | +                     | -                  | -                         | -        |
| Ep F    | +                    | -                 | -            | -                     | -                  | -                         | -        |
| Ep L    | +                    | -                 | -            | -                     | -                  | -                         | -        |
| Hp H    | +                    | -                 | +            | -                     | -                  | -                         | -        |
| Hr Fr   | +                    | -                 | -            | -                     | -                  | -                         | -        |
| Lc S    | -                    | -                 | +            | +                     | -                  | -                         | -        |
| Mc F    | +                    | +                 | -            | -                     | -                  | -                         | -        |
| Ob H    | +                    | +                 | -            | -                     | -                  | -                         | -        |
| Pm H    | +                    | +                 | -            | -                     | -                  | -                         | -        |
| Poa H   | +                    | +                 | -            | -                     | -                  | -                         | -        |
| Ps S    | -                    | -                 | +            | -                     | +                  | -                         | -        |
| Pta L   | +                    | +                 | -            | +                     | -                  | -                         | -        |
| Sg L    | +                    | -                 | -            | -                     | -                  | -                         | -        |
| So R    | +                    | -                 | -            | -                     | -                  | -                         | +        |
| To F    | +                    | +                 | -            | +                     | -                  | -                         | -        |
| To L    | +                    | +                 | -            | -                     | -                  | -                         | -        |
| To R    | +                    | +                 | -            | -                     | -                  | -                         | -        |
| Tp F    | +                    | -                 | -            | -                     | -                  | -                         | -        |
| Ur L    | +                    | -                 | -            | +                     | -                  | -                         | -        |
| Ur R    | -                    | +                 | -            | -                     | +                  | -                         | -        |
| Vo R    | +                    | +                 | -            | -                     | -                  | -                         | +        |

Table S3. The comparison of methods used to detect flavonoids (FD).

| Method  | Ferric chloride test | Lead acetate test | Zinc hydrochloride test | Shinoda test | Alkaline reagent test | Aluminium chloride test | Ammonium test | Ammonia and H <sub>2</sub> SO <sub>4</sub> test |
|---------|----------------------|-------------------|-------------------------|--------------|-----------------------|-------------------------|---------------|-------------------------------------------------|
| Extract | FD                   | FD                | FD                      | FD           | FD                    | FD                      | FD            | FD                                              |
| Alv L   | -                    | -                 | -                       | -            | -                     | -/+                     | -/+           | -                                               |
| Am Fr   | -                    | -                 | +                       | +            | -                     | -                       | -             | -                                               |
| Arv H   | -                    | +                 | -                       | -            | -                     | -/+                     | -             | -                                               |
| Bv R    | -                    | -                 | -                       | +            | -                     | -/+                     | -             | -                                               |
| Co F    | -                    | +                 | -                       | -            | -                     | -/+                     | -/+           | +                                               |
| Ea H    | -                    | +                 | -                       | -            | -                     | -/+                     | -/+           | +                                               |
| Ep F    | -                    | -                 | -                       | +            | -                     | -/+                     | -/+           | -                                               |
| Ep L    | -                    | -                 | -                       | -            | -                     | -/+                     | -/+           | -                                               |
| Hp H    | -                    | -                 | -                       | -            | -                     | -/+                     | -/+           | -                                               |
| Hr Fr   | -                    | -                 | -                       | +            | -                     | -/+                     | +             | +                                               |
| Lc S    | -                    | -                 | -                       | +            | -                     | +                       | -             | -/+                                             |
| Mc F    | -                    | -                 | -                       | -            | -                     | -/+                     | -/+           | +                                               |
| Ob H    | -                    | -                 | -                       | -            | -                     | -/+                     | -/+           | -/+                                             |
| Pm H    | -                    | -                 | -                       | -            | -                     | -/+                     | -/+           | -/+                                             |
| Poa H   | -                    | +                 | -                       | -            | -                     | -/+                     | +             | -/+                                             |
| Ps S    | -                    | -                 | -                       | +            | -                     | +                       | -             | -                                               |
| Pta L   | -                    | +                 | -                       | -            | -                     | -/+                     | -             | -                                               |
| Sg L    | -                    | -                 | -                       | -            | -                     | -/+                     | -/+           | -/+                                             |
| So R    | -                    | -                 | -                       | -            | -                     | -/+                     | -/+           | -                                               |
| To F    | -                    | +                 | -                       | -            | -                     | -/+                     | -/+           | +                                               |
| To L    | -                    | +                 | -                       | -            | -                     | -/+                     | -/+           | -                                               |
| To R    | -                    | +                 | -                       | -            | -                     | -/+                     | +             | +                                               |
| Tp F    | -                    | -                 | -                       | +            | -                     | -/+                     | -/+           | +                                               |
| Ur L    | -                    | -                 | -                       | -            | -                     | -/+                     | -             | -/+                                             |
| Ur R    | -                    | -                 | -                       | -            | -                     | -/+                     | -             | -/+                                             |
| Vo R    | -                    | +                 | -                       | -            | -                     | -/+                     | -             | -                                               |

**Table S4. The comparison of methods used to detect anthocyanins (AC), and flavones (FL).**

| Method  | NaOH test | H <sub>2</sub> SO <sub>4</sub> test | NaOH test | H <sub>2</sub> SO <sub>4</sub> test |
|---------|-----------|-------------------------------------|-----------|-------------------------------------|
| Extract | AC        | AC                                  | FL        | FL                                  |
| Alv L   | -         | +                                   | -         | +                                   |
| Am Fr   | -         | +                                   | -         | +                                   |
| Arv H   | -         | -/+                                 | -         | -/+                                 |
| Bv R    | -         | -                                   | -         | -                                   |
| Co F    | -         | -/+                                 | -         | -/+                                 |
| Ea H    | -         | -/+                                 | -/+       | -/+                                 |
| Ep F    | -         | -/+                                 | -         | -/+                                 |
| Ep L    | -         | -/+                                 | -/+       | -/+                                 |
| Hp H    | -         | +                                   | -/+       | +                                   |
| Hr Fr   | -         | -                                   | +         | -                                   |
| Lc S    | -         | -                                   | -/+       | -                                   |
| Mc F    | -         | -                                   | +         | -                                   |
| Ob H    | -         | -/+                                 | -         | -/+                                 |
| Pm H    | -         | -/+                                 | -/+       | -/+                                 |
| Poa H   | -         | +                                   | +         | +                                   |
| Ps S    | -         | -                                   | -/+       | -                                   |
| Pta L   | -         | +                                   | -         | +                                   |
| Sg L    | -         | -/+                                 | -         | -/+                                 |
| So R    | -         | -/+                                 | -         | -/+                                 |
| To F    | -         | -/+                                 | -         | -/+                                 |
| To L    | -         | -                                   | -         | -                                   |
| To R    | -         | -                                   | +         | -                                   |
| Tp F    | -         | +                                   | -/+       | +                                   |
| Ur L    | -         | +                                   | -/+       | +                                   |
| Ur R    | -         | -                                   | -/+       | -                                   |
| Vo R    | -         | -                                   | -         | -                                   |

Table S5. The comparison of methods used to detect quinones (QNO).

| Method  | H <sub>2</sub> SO <sub>4</sub> test | HCl test | Ammonia test |
|---------|-------------------------------------|----------|--------------|
| Extract | QNO                                 | QNO      | QNO          |
| Alv L   | -                                   | -        | -            |
| Am Fr   | +                                   | -        | -            |
| Arv H   | -                                   | -        | -            |
| Bv R    | -                                   | -        | -            |
| Co F    | -                                   | -/+      | -            |
| Ea H    | -                                   | -        | -            |
| Ep F    | -                                   | -/+      | -            |
| Ep L    | -                                   | -        | -            |
| Hp H    | -                                   | -        | -            |
| Hr Fr   | -                                   | -        | -            |
| Lc S    | -                                   | -        | -            |
| Mc F    | -                                   | -        | -            |
| Ob H    | -                                   | -        | -            |
| Pm H    | -                                   | -        | -            |
| Poa H   | -                                   | -        | -            |
| Ps S    | -                                   | -        | -            |
| Pta L   | -                                   | -        | -            |
| Sg L    | -                                   | -        | -            |
| So R    | -                                   | -/+      | -            |
| To F    | -                                   | -        | -            |
| To L    | -                                   | -/+      | -            |
| To R    | -                                   | -        | -            |
| Tp F    | -                                   | -        | -            |
| Ur L    | -                                   | -        | -            |
| Ur R    | -/+                                 | -        | -            |
| Vo R    | -                                   | -        | -            |

Table S6. The comparison of methods used to detect glycosides.

| Method  | Bromine water test | Baljet test | Keller-Killiani test | Borntrager's tests (1) | Borntrager's tests (2) | Molisch's test |
|---------|--------------------|-------------|----------------------|------------------------|------------------------|----------------|
| Extract | GS                 | CGS         | CGS                  | CYGS                   | GS                     | GS             |
| Alv L   | -                  | -           | -                    | -                      | -                      | +              |
| Am Fr   | -                  | -           | -                    | -                      | -                      | -              |
| Arv H   | -/+                | -           | -                    | -                      | -                      | +              |
| Bv R    | -                  | -           | -/+                  | -                      | -                      | -              |
| Co F    | -                  | -           | -/+                  | -                      | -                      | +              |
| Ea H    | -                  | -/+         | -                    | -                      | -                      | +              |
| Ep F    | -                  | -           | -/+                  | -                      | -                      | -              |
| Ep L    | -                  | -           | -                    | -                      | -                      | -              |
| Hp H    | -                  | -           | -/+                  | -                      | -                      | -              |
| Hr Fr   | -                  | -           | -                    | -                      | -                      | -              |
| Lc S    | -                  | -           | -                    | -                      | -                      | +              |
| Mc F    | -                  | -           | -                    | -                      | -                      | +              |
| Ob H    | -                  | -/+         | -                    | -                      | -                      | +              |
| Pm H    | -                  | -           | -                    | -                      | -                      | -              |
| Poa H   | -                  | -           | -                    | -                      | -                      | +              |
| Ps S    | -                  | -           | -                    | -                      | -                      | +              |
| Pta L   | -                  | -/+         | -                    | -                      | -                      | -              |
| Sg L    | -                  | -           | -/+                  | -                      | -                      | +              |
| So R    | -                  | -           | -/+                  | -                      | -                      | +              |
| To F    | -                  | -/+         | -/+                  | -                      | -                      | -              |
| To L    | -                  | -           | +                    | -                      | -                      | -              |
| To R    | -                  | -           | -                    | -                      | -                      | -              |
| Tp F    | -                  | -           | -                    | -                      | -                      | +              |
| Ur L    | -                  | -           | +                    | -                      | -                      | +              |
| Ur R    | +                  | -           | -                    | -                      | -                      | +              |
| Vo R    | -                  | -           | +                    | -                      | -                      | -              |

Table S7. The comparison of methods used to detect sugars.

| Method  | Bromine water test | Borntrager's tests (2) | Molisch's test | Fehling's test | Benedict's test | Selwinoff's test | Barfoed's test |
|---------|--------------------|------------------------|----------------|----------------|-----------------|------------------|----------------|
| Extract | SG                 | SG                     | SG             | SG             | SG              | SG               | SG             |
| Alv L   | -                  | -                      | +              | -              | +               | -                | -              |
| Am Fr   | -                  | -                      | -              | -              | +               | +                | -              |
| Arv H   | -                  | -                      | +              | -              | +               | -                | +              |
| Bv R    | -                  | -                      | -              | -              | +               | +                | -              |
| Co F    | -                  | -                      | +              | -              | +               | -                | -              |
| Ea H    | -                  | -                      | +              | -              | +               | -                | -              |
| Ep F    | -                  | -                      | -              | -              | +               | -                | -              |
| Ep L    | -                  | -                      | -              | -              | +               | -                | -              |
| Hp H    | -                  | -                      | -              | -              | +               | +                | -              |
| Hr Fr   | -                  | -                      | -              | -              | +               | -                | -              |
| Lc S    | -                  | -                      | +              | -              | -               | -                | -              |
| Mc F    | -                  | -                      | +              | -              | +               | -                | -              |
| Ob H    | -                  | -                      | +              | -              | +               | -                | -              |
| Pm H    | -                  | -                      | -              | -              | +               | -                | -              |
| Poa H   | -                  | -                      | +              | -              | +               | -                | -              |
| Ps S    | -                  | -                      | +              | -              | -               | -                | -              |
| Pta L   | -                  | -                      | -              | -              | +               | -                | +              |
| Sg L    | -                  | -                      | +              | -              | +               | -                | -              |
| So R    | -                  | -                      | +              | -              | +               | -                | -              |
| To F    | -                  | -                      | -              | -              | +               | -                | -              |
| To L    | -                  | -                      | -              | -              | +               | -                | -              |
| To R    | -                  | -                      | -              | -              | +               | -                | +              |
| Tp F    | -                  | -                      | +              | -              | +               | -                | -              |
| Ur L    | -                  | -                      | +              | -              | +               | -                | -              |
| Ur R    | -                  | -                      | +              | -              | +               | -                | -              |
| Vo R    | -                  | -                      | -              | -              | +               | -                | -              |
